# Supplementary material for: Cross-sectional and longitudinal changes in category-selectivity in visual cortex following pediatric cortical resection
Source: PubMed Central journal article supplement (PMC11661110; doi:10.1101/2024.12.08.627367), 2024-12-12
Supplement: media-1.pdf [file media-1.pdf]

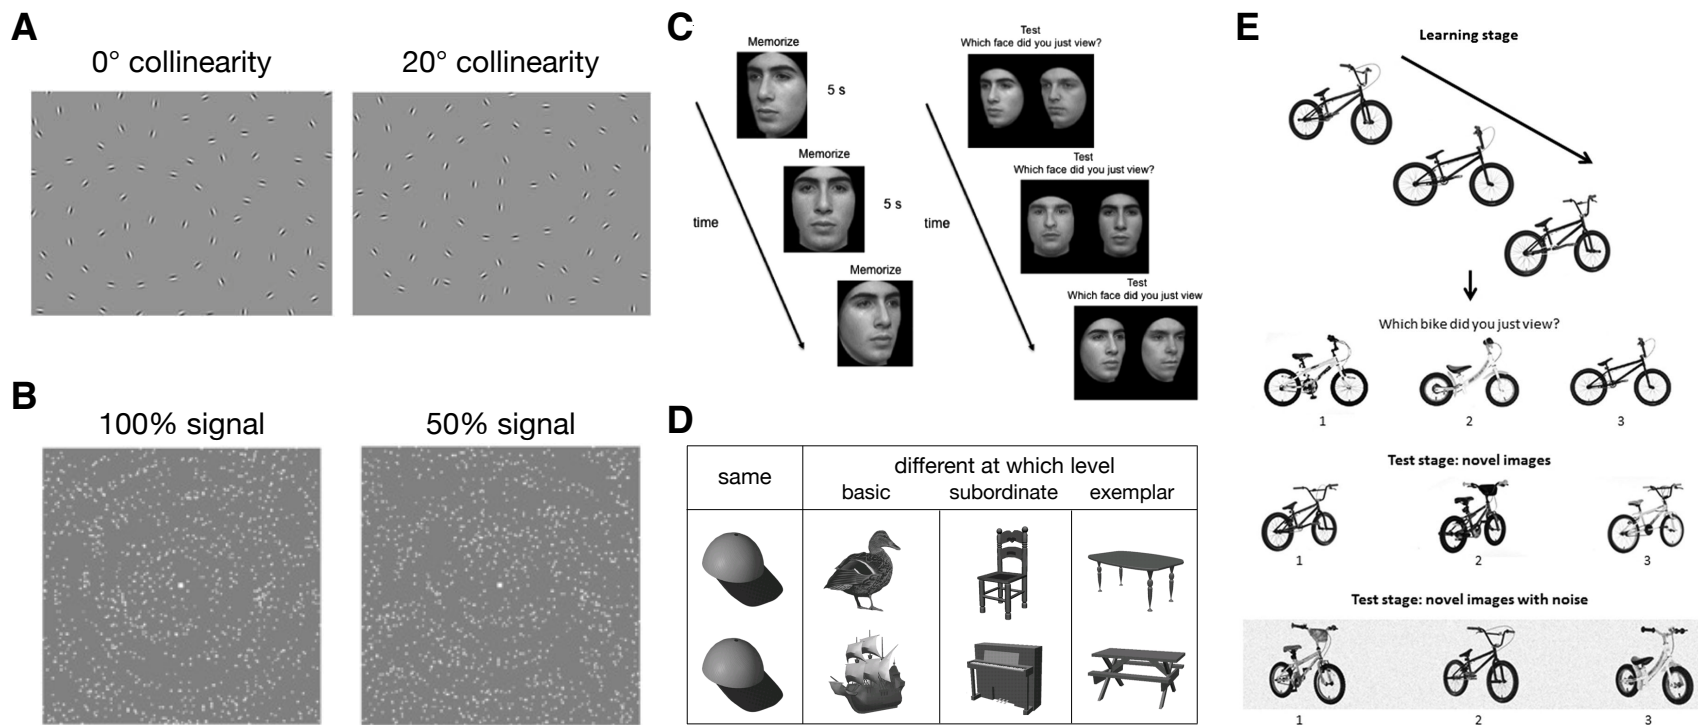

**Fig. S1. Design of behavioral experiments.**

(A) Contour integration (Hadad et al., 2010). Task: Participants viewed a brief presentation of either aligned or misaligned Gabor patches (in separate blocks) and indicated the leftward or rightward direction of the embedded 'egg-like' shape. (B) Glass pattern (Lewis et al., 2002). Task: Participants indicated which of the two displays had a more concentric swirl. (C) Cambridge Face Memory Test for Children (Croydon et al., 2014). Task: Participants were instructed to remember target faces and subsequently identify them amongst an array of distractor faces. (D) Object matching experiment (Gauthier et al., 1999). Task: Participants made same/different discriminations on pairs of objects and pressed a 'same' or 'different' button to indicate their response. (E) Cambridge Bicycle Memory Test for Children (Bennetts et al., 2017). Task: Participants were instructed to remember target bicycles and subsequently identify them amongst novel images of bicycles.

|             | <i>l</i> IFG | <i>l</i> STG | <i>l</i> VWFA | <i>l</i> FFA | <i>l</i> STS | <i>l</i> PF | <i>l</i> LOC | <i>l</i> PPA | <i>l</i> ITOS | <i>l</i> EVC | <i>r</i> EVC | <i>r</i> TOS | <i>r</i> PPA | <i>r</i> LOC | <i>r</i> PF | <i>r</i> STS | <i>r</i> FFA |
|-------------|--------------|--------------|---------------|--------------|--------------|-------------|--------------|--------------|---------------|--------------|--------------|--------------|--------------|--------------|-------------|--------------|--------------|
| KN (11y)    | □            | □            | □             | ○            | ○            | ○           | ○            | ○            | ○             | ○            | ■            | ■            | ■            | ■            | ■           | △            | ■            |
| SN (12y6m)  | □            | □            | □             | ■            | ■            | ■           | ■            | ■            | ■             | ■            | ■            | ■            | ■            | ■            | ■           | ■            | ■            |
| OT (14y8m)  | ●            | ■            | ■             | ■            | ■            | ■           | ■            | ■            | ■             | ■            | ■            | ■            | ■            | ■            | ■           | ■            | ■            |
| OT (17y7m)  | ●            | ■            | ■             | ■            | ■            | ■           | ■            | ■            | ■             | ■            | ■            | ■            | ■            | ■            | ■           | ■            | ■            |
| OT (18y5m)  | ●            | ■            | ■             | ■            | ■            | ■           | ■            | ■            | ■             | ■            | ■            | ■            | ■            | ■            | ■           | ■            | ■            |
| TC (13y3m)  | △            | △            | □             | ○            | ○            | ○           | ○            | ○            | ○             | ○            | ■            | ■            | ■            | ■            | ■           | ■            | ■            |
| TC (13y11m) | □            | △            | □             | ○            | ○            | ○           | ○            | ○            | ○             | ○            | ■            | ■            | ■            | ■            | ■           | ■            | ■            |
| TC (15y9m)  | □            | □            | □             | ○            | ○            | ○           | ○            | ○            | ○             | ○            | ■            | ■            | ■            | ■            | ■           | ■            | ■            |
| UD (7y10m)  | ●            | ■            | ■             | △            | △            | ■           | ■            | ■            | ■             | ■            | ○            | ○            | ○            | ○            | ○           | ○            | ○            |
| UD (8y4m)   | ●            | ■            | ■             | ■            | ■            | ■           | ■            | ■            | ■             | ■            | ○            | ○            | ○            | ○            | ○           | ○            | ○            |
| UD (8y10m)  | ●            | ■            | ■             | ■            | ■            | ■           | ■            | ■            | ■             | ■            | ○            | ○            | ○            | ○            | ○           | ○            | ○            |
| UD (10y10m) | ■            | ■            | ■             | ■            | ■            | ■           | ■            | ■            | ■             | ■            | ○            | ○            | ○            | ○            | ○           | ○            | ○            |
| UD (13y)    | ■            | ■            | ■             | ■            | ■            | ■           | ■            | ■            | ■             | ■            | ○            | ○            | ○            | ○            | ○           | ○            | ○            |

■ Defined in the typical hemisphere □ Remapped to the other hemisphere ○ Resected △ Not found ● Not covered

**Fig. S2. The presence of category-selective regions of interest (ROIs) in each patient.**

l = left, r = right, IFG = inferior frontal gyrus, STG = superior temporal gyrus, VWFA = visual word form area, FFA = fusiform face area, STS = superior temporal sulcus, PF = posterior fusiform, LOC = lateral occipital complex, PPA = parahippocampal place area, TOS = transverse occipital sulcus, EVC = early visual cortex.

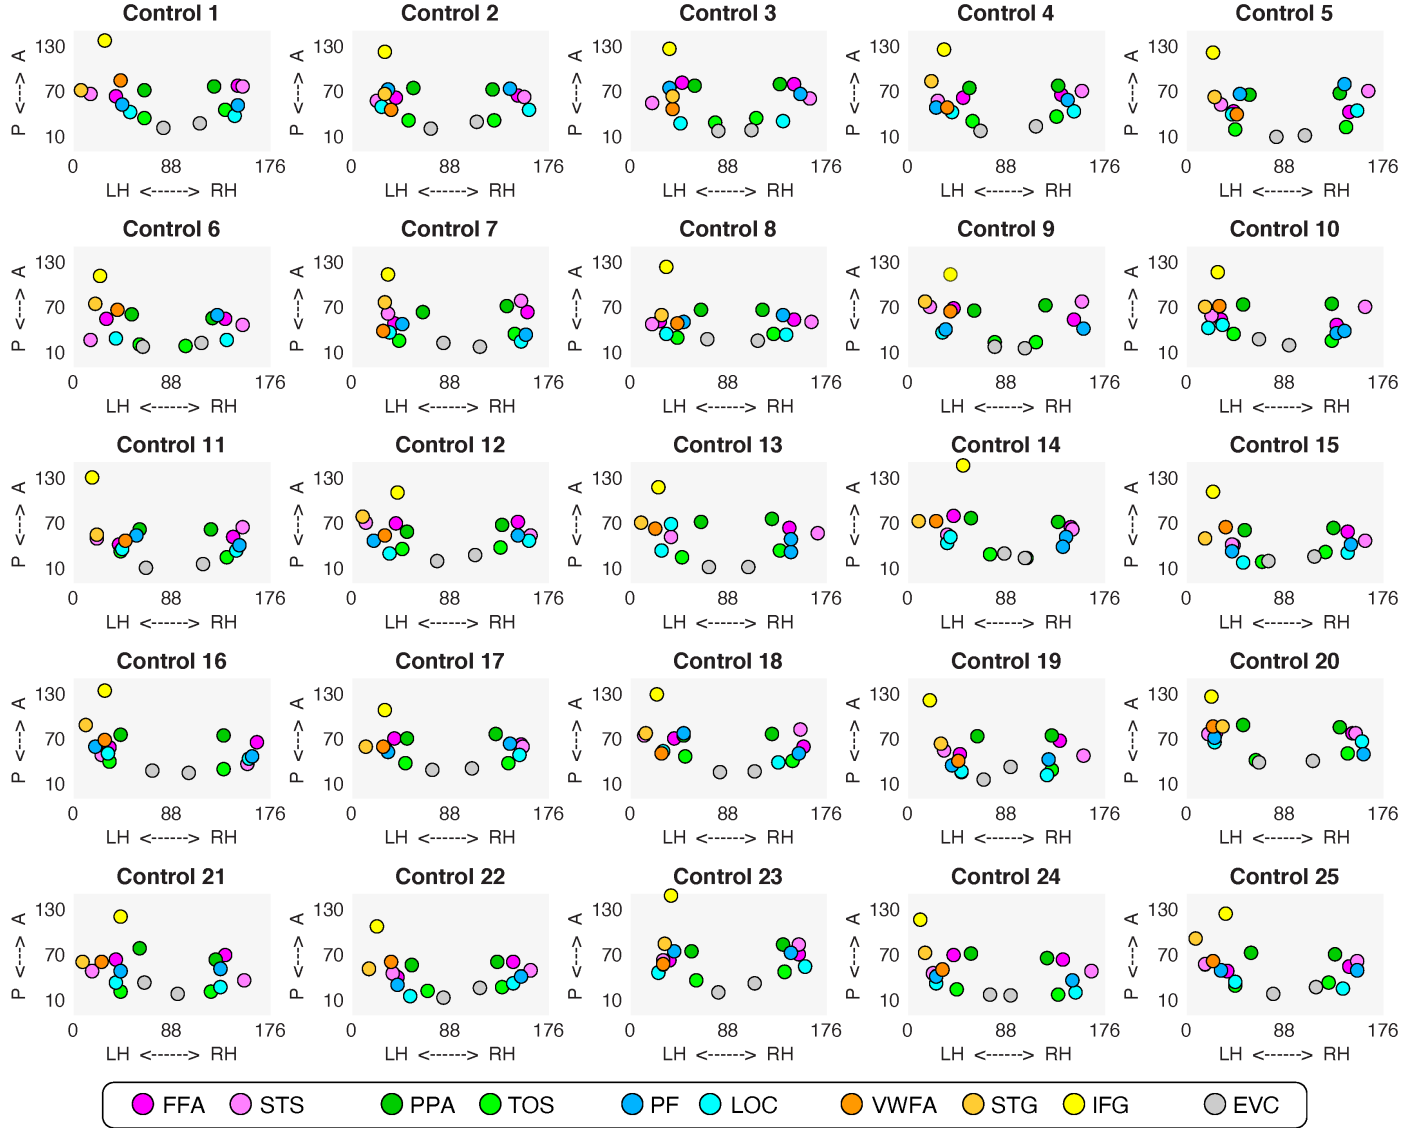

**Fig. S3. Spatial organization of category selectivity in each individual control (n=25).**

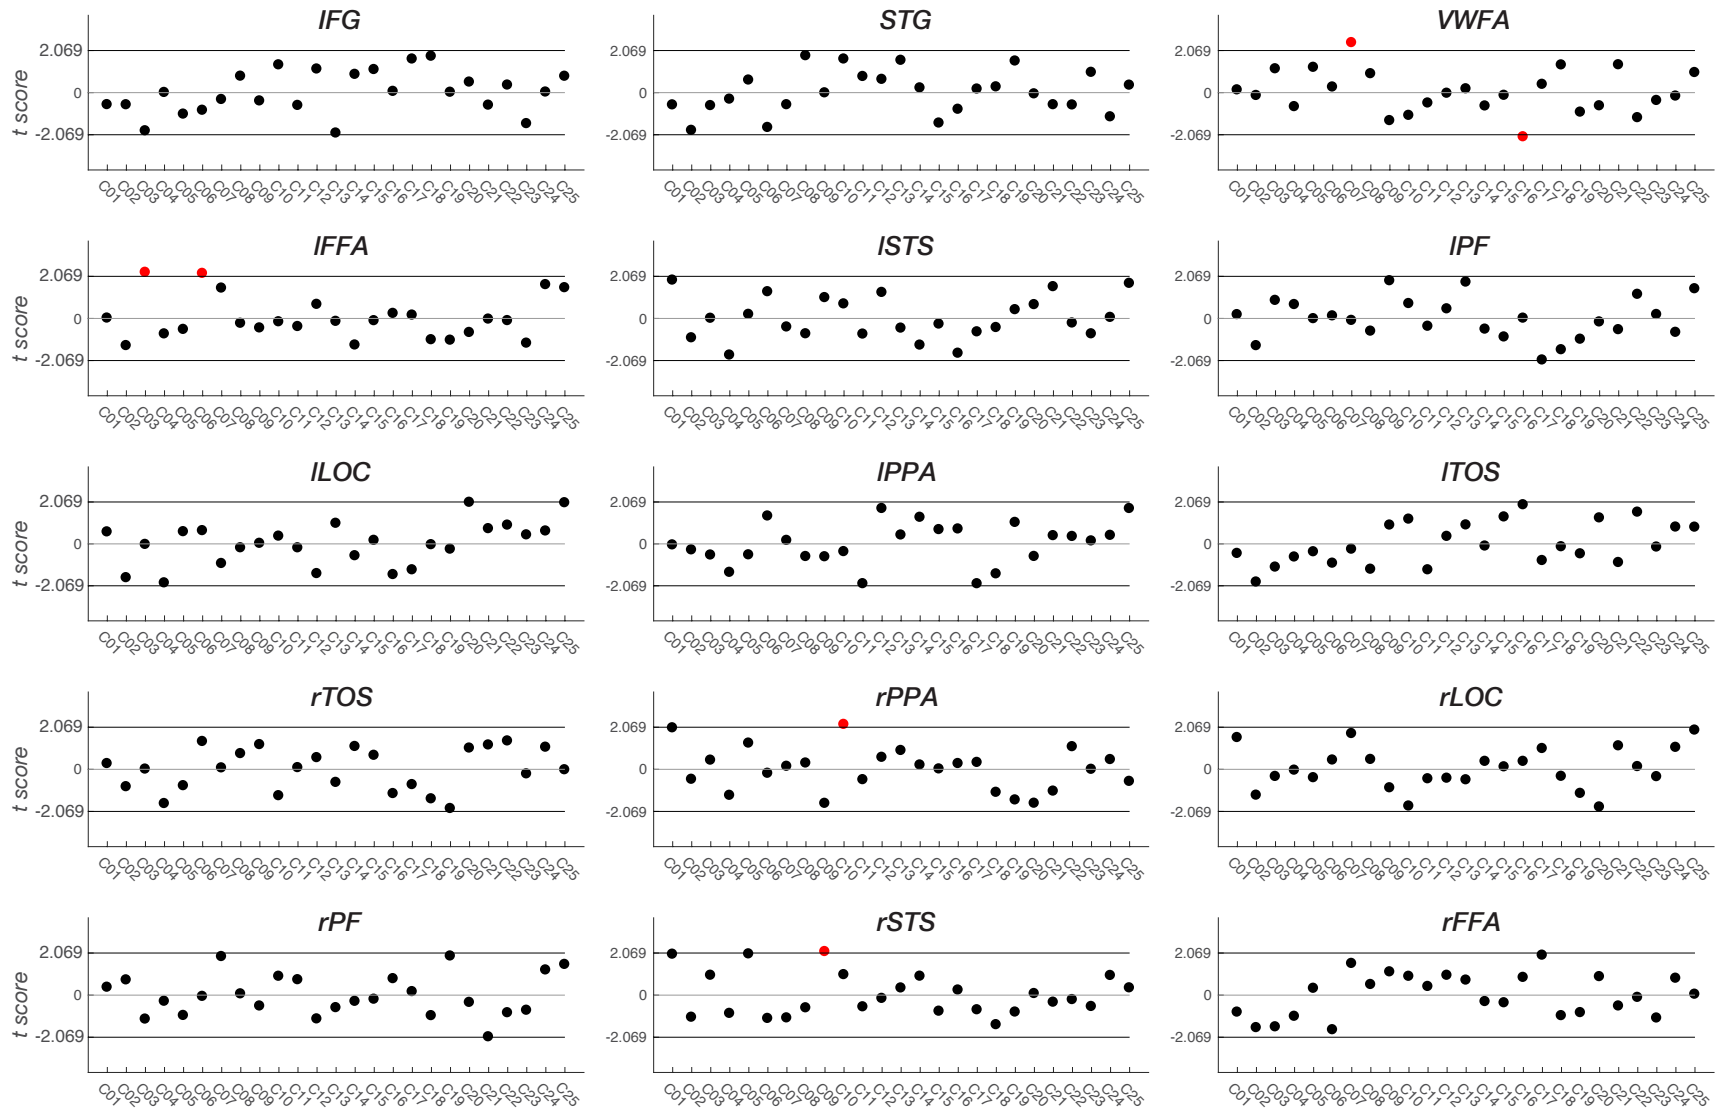

**Fig. S4. Crawford's t tests compared representational similarity of all category-selective ROIs in each control participant to the rest of the controls. Red dots indicate significant deviations.**

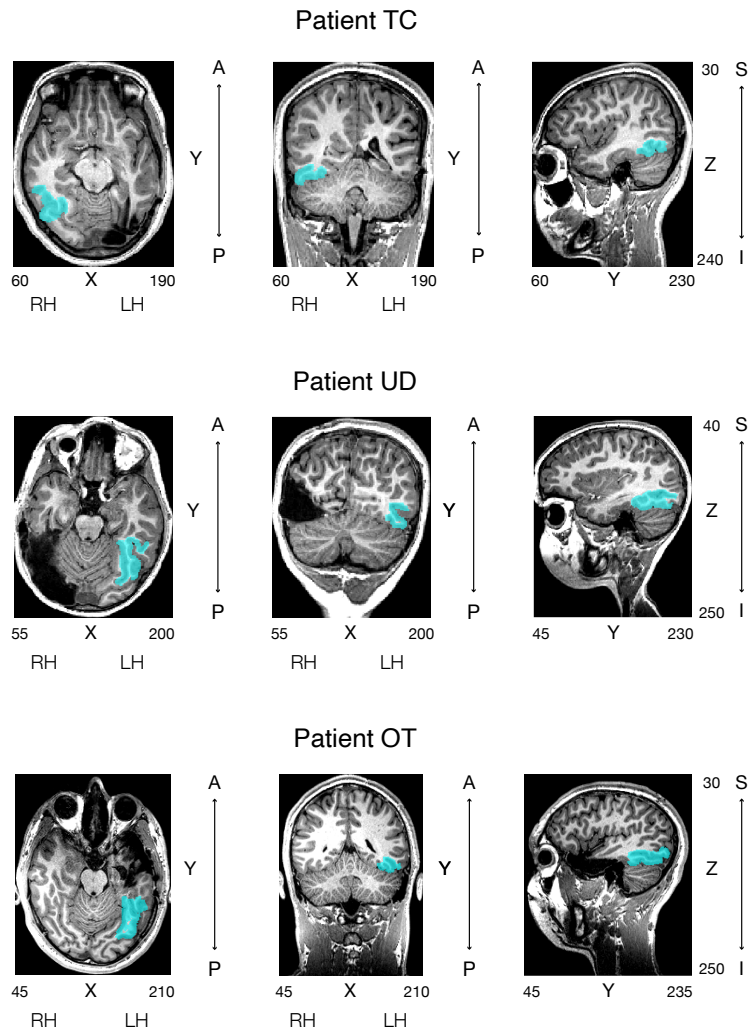

**Fig. S5. The anatomically defined right FG/OTS region visualized in corresponding volume space for TC, UD and OT. Total number of anatomical voxels (1mm isotropic) is 7307 in TC, 12428 in UD, and 12013 in OT. A = anterior, P = posterior, S = superior, I = inferior, RH = right hemisphere, LH = left hemisphere.**

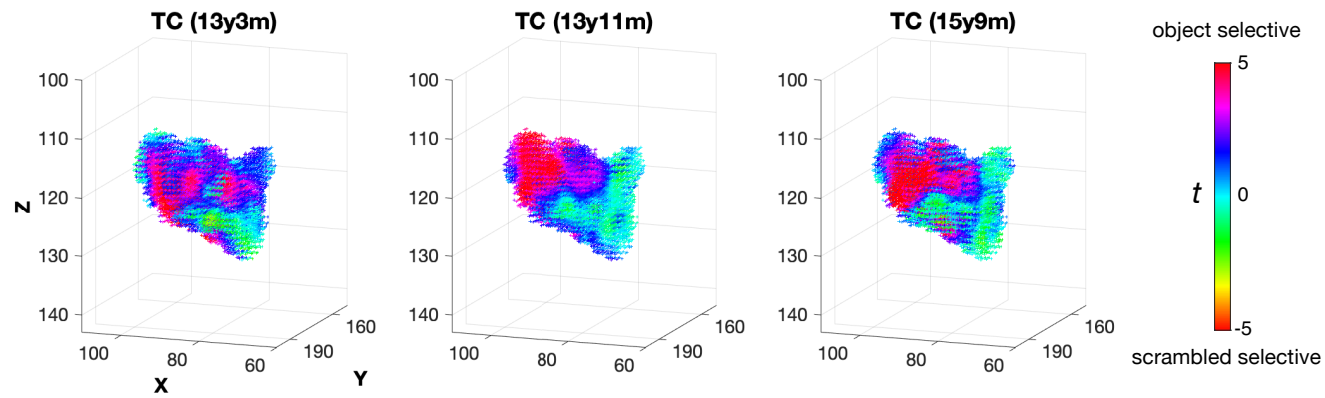

**Fig. S6. Longitudinal object versus scramble object selectivity in the anatomically defined FG/OTS in TC (3 sessions).**  $t$  score denotes changes over time in each voxel's selectivity of objects over scrambled objects. There were no significant differences between any two scan sessions, all  $|t|$  values  $< 1.549$ , all  $p$  values  $> 0.122$ , independent-samples  $t$  tests at the voxel level.

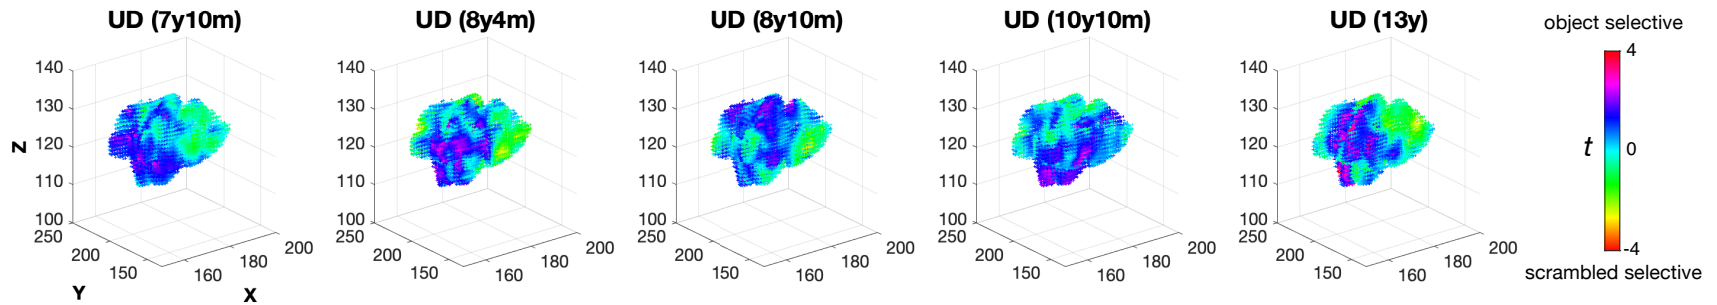

**Fig. S7. Longitudinal object versus scramble object selectivity in the anatomically defined FG/OTS in UD (5 sessions).**  $t$  score denotes changes over time in each voxel's selectivity of objects over scrambled objects. There were no significant differences between any two scan sessions (all  $|t|$  values  $< 1.741$ , all  $p$  values  $> 0.082$ ), independent-samples  $t$  tests at the voxel level.

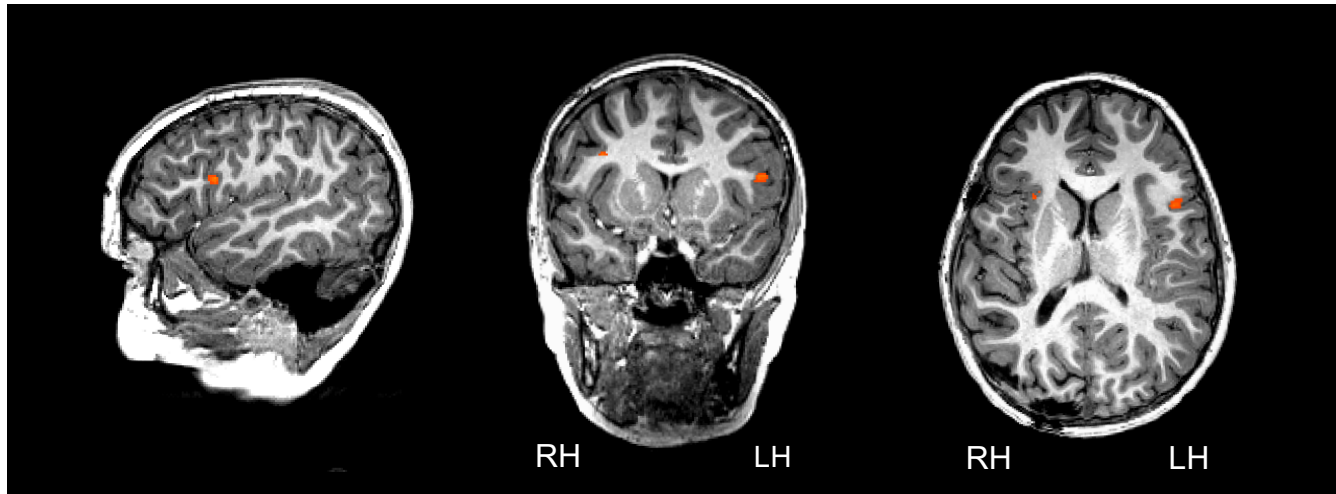

**Fig. S8. Post-surgical language mapping results in TC.**

Language-selective activation was found in the left Inferior Frontal Gyrus (Broca's area); no language-selective activation was found near the left Superior Temporal Gyrus (Wernicke's area) and no obvious language-selective activation was visible in the right hemisphere.



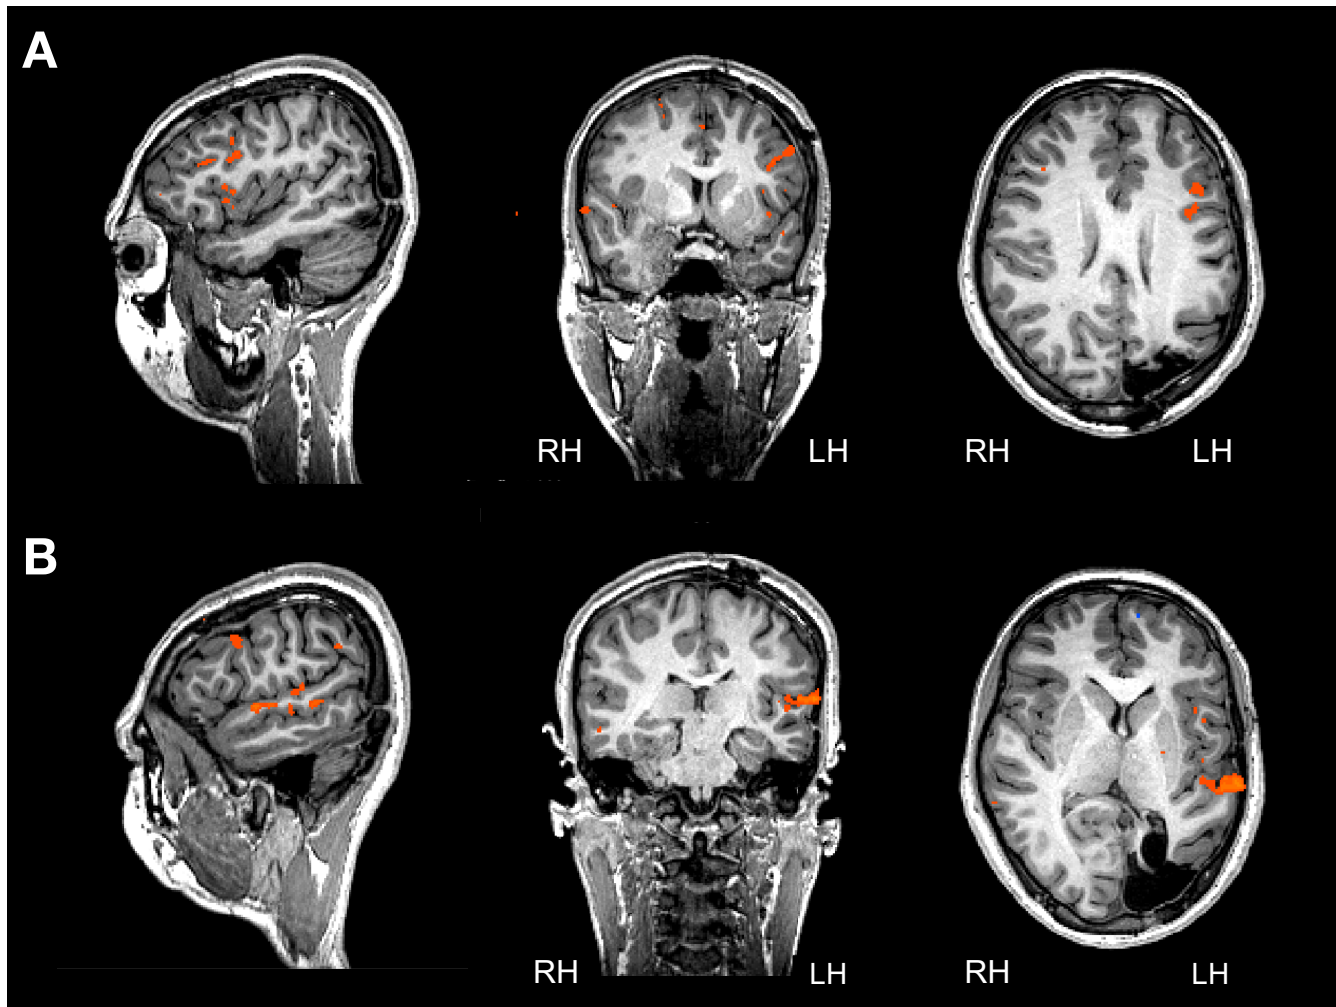

**Fig. S9. Post-surgical language mapping results in UD.**

A) language-selective activation in the left Inferior Frontal Gyrus (Broca's area)

B) language-selective activation in the left Superior Temporal Gyrus (Wernicke's area)

**Table S1. Demographic and surgical information for each of the five patients**

| Code | Gender | Diagnosis/Pathology                                                                                                           | Preop MRI                                                 | Age at surgery | Lesioned hemisphere | Resection                                                                                                                | Visual Fields                 | EESOS* |
|------|--------|-------------------------------------------------------------------------------------------------------------------------------|-----------------------------------------------------------|----------------|---------------------|--------------------------------------------------------------------------------------------------------------------------|-------------------------------|--------|
| KN   | M      | N/A                                                                                                                           | N/A                                                       | 20m            | left                | left hemispherectomy                                                                                                     | N/A                           | N/A    |
| SN   | M      | N/A                                                                                                                           | N/A                                                       | 1d             | left                | evacuation of left temporal hematoma                                                                                     | N/A                           | N/A    |
| TC   | F      | perinatal stroke with medically intractable focal epilepsy/multifocal encephalomalacia consistent with remote ischemic injury | abnormal MRI with lesion in the left occipital lobe       | 13y3m          | left                | left posterior parietal and occipital lobectomy                                                                          | right superior quadrantanopia | IID    |
| UD   | M      | medically intractable focal epilepsy, symptomatic lesion/dysembryoplastic neuroepithelial tumor                               | abnormal MRI with lesion in the right temporal lobe       | 6y9m           | right               | right medial inferior temporal lobe gross total tumor resection with posterior temporal and occipital lobectomy          | left hemianopia               | IA     |
| OT   | M      | medically intractable focal epilepsy, symptomatic lesion/ganglioglioma, FCD                                                   | abnormal MRI with lesion in the medial left temporal lobe | 13y4m          | left                | medial left temporal lobe gross total tumor resection and left temporal lobectomy with preservation of medial structures | full                          | IA     |

\* EESOS: Engle Epilepsy Surgery Outcome Scale

**Table S2. Patients' neuropsychological evaluation test performance pre- and post-surgery.**

| Code | Detailed IQ measures                                                                                                                                             | Vision or visual motor integration                                  | Memory & learning                                   | Executive function                                                                      | Academic skills/performance                                                                                                                                                         |
|------|------------------------------------------------------------------------------------------------------------------------------------------------------------------|---------------------------------------------------------------------|-----------------------------------------------------|-----------------------------------------------------------------------------------------|-------------------------------------------------------------------------------------------------------------------------------------------------------------------------------------|
| KN   | not done                                                                                                                                                         | not done                                                            | not done                                            | not done                                                                                | not done                                                                                                                                                                            |
| SN   | not done                                                                                                                                                         | not done                                                            | not done                                            | not done                                                                                | not done                                                                                                                                                                            |
| TC   | <i>Pre-surgery:</i><br>WIAT III: 2 <sup>nd</sup> percentile*<br><i>Post-surgery:</i><br>not done                                                                 | not done                                                            | not done                                            | not done                                                                                | PPVT: 1st percentile*<br>WIAT III:<br>Reading: 1st grade*<br>Spelling: 2nd grade*                                                                                                   |
| UD   | <i>Pre-surgery:</i><br>WASI: 116 (full scale), 135 (verbal), 97 (performance)<br><i>Post-surgery:</i><br>WASI: 118 (full scale), 123 (verbal), 108 (performance) | Grooved pegboard:<br>50 <sup>th</sup> percentile<br>(dominant hand) | not done                                            | Working memory<br>(from WISC-V):<br><i>Post-surgery:</i><br>34 <sup>th</sup> percentile | WJ III ACH:<br>Reading: 63 <sup>rd</sup> percentile<br>Letter-Word: 67 <sup>th</sup> percentile<br>Passage: 56 <sup>th</sup> percentile<br>Calculation: 91 <sup>st</sup> percentile |
| OT   | <i>Pre-surgery:</i><br>WASI: 122 (full scale), 125 (verbal), 114 (performance)<br><i>Post-surgery:</i><br>WASI: 127 (full scale)                                 | Grooved pegboard: average<br>(dominant hand)                        | CVLT-C:<br>high average<br>WRAML-2:<br>high average | D-KEFS: superior                                                                        | WJ III ACH: above age and grade expectancy                                                                                                                                          |

\* Could not be reliably obtained due to language barrier

PPVT: Peabody Picture Vocabulary Test

CVLT-C: California Verbal Learning Test–Children's Version

D-KEFS: The Delis–Kaplan Executive Function System

Grooved Pegboard: Grooved Pegboard for Manipulation and Dexterity Testing

WASI: Wechsler Abbreviated Scale of Intelligence

WIAT-III: Wechsler Individual Achievement Test–Third Edition

WISC-V: Wechsler Intelligence Scale for Children–Fifth Edition

WJ III ACH: The Woodcock-Johnson III Tests of Achievement

WRAML-2: Wide Range Assessment of Memory and Learning–Second Edition

**Table S3. Demographic information for each of the 25 fMRI controls.**

| Control | Gender | Age at scan |       |
|---------|--------|-------------|-------|
|         |        | year        | month |
| C1      | F      | 7           | 1     |
| C2      | M      | 7           | 5     |
| C3      | M      | 8           | 6     |
| C4      | F      | 8           | 10    |
| C5      | M      | 8           | 11    |
| C6      | F      | 9           | 9     |
| C7      | M      | 10          | 3     |
| C8      | M      | 10          | 4     |
| C9      | F      | 10          | 8     |
| C10     | M      | 11          | 1     |
| C11     | M      | 11          | 5     |
| C12     | M      | 11          | 9     |
| C13     | M      | 12          | 1     |
| C14     | F      | 12          | 6     |
| C15     | M      | 12          | 10    |
| C16     | F      | 13          | 5     |
| C17     | M      | 14          | 4     |
| C18     | F      | 14          | 6     |
| C19     | F      | 14          | 9     |
| C20     | F      | 14          | 11    |
| C21     | M      | 15          | 0     |
| C22     | F      | 15          | 8     |
| C23     | M      | 16          | 3     |
| C24     | M      | 18          | 2     |
| C25     | M      | 18          | 8     |
